# Supplementary material for: Implementation and Effectiveness of an Interprofessional Support Program for Patients with Type 2 Diabetes in Swiss Primary Care: A Study Protocol
Source: MDPI journal article supplement (doi:10.3390/pharmacy8020106), 2020-06-21
Supplement: s1 [file s1]

### Supplementary File 3

Table S3: List of instructional material delivered during the first training

|                               |                                                                                                                                                                                                                                                                            |
|-------------------------------|----------------------------------------------------------------------------------------------------------------------------------------------------------------------------------------------------------------------------------------------------------------------------|
| <b>Sispha material</b>        |                                                                                                                                                                                                                                                                            |
| 1.                            | Organizational checklist for the implementation at the pharmacy                                                                                                                                                                                                            |
| 2.                            | Program leaflet                                                                                                                                                                                                                                                            |
| 3.                            | A team rationale (how to respond to FAQs from the team and from patients)                                                                                                                                                                                                  |
| 4.                            | Patient inclusion diagram                                                                                                                                                                                                                                                  |
| 5.                            | Patient follow-up diagram                                                                                                                                                                                                                                                  |
| 6.                            | Procedures of patients motivational interviews:<br>(a) first visit,<br>(b) drafting of the interview report,<br>(c) follow-up visit                                                                                                                                        |
| 7.                            | Algorithm for the selection of medications to be monitored by the electronic pillbox                                                                                                                                                                                       |
| 8.                            | Presentation slides<br>(a) First training<br>(b) For physicians<br>(c) For medical assistants<br>(d) For pharmacy technicians                                                                                                                                              |
| 9.                            | Collaboration with physicians<br>(a) Information letter for physicians<br>(b) Practical procedure for collaboration with physicians<br>(c) Examples of letters to send to physicians<br>(d) Information document for medical assistants<br>(e) A rationale for physicians  |
| 10.                           | Various tools<br>(a) Diary for the pharmacy<br>(b) Procedure for identifying eligible patients through a billing system<br>(c) Example of a letter that could be sent to eligible patients<br>(d) Histogram of patient inclusion follow-up<br>(e) Information for patients |
| <b>Research team material</b> |                                                                                                                                                                                                                                                                            |
| 1.                            | Patient follow-up schedule                                                                                                                                                                                                                                                 |
| 2.                            | Participation refusal document                                                                                                                                                                                                                                             |
| 3.                            | Quality of life generic questionnaire SF12                                                                                                                                                                                                                                 |
| 4.                            | Quality of life specific questionnaire ADDQoL                                                                                                                                                                                                                              |
| 5.                            | Patient information and consent form                                                                                                                                                                                                                                       |
| 6.                            | Study protocol                                                                                                                                                                                                                                                             |
| 7.                            | 10 patients files including for each: an information and consent form and 4 envelopes to be given to the patient (at T0 months, T0+6months, T0+12months, T0+15 months)                                                                                                     |
