# Supplementary material for: Implementation and Effectiveness of an Interprofessional Support Program for Patients with Type 2 Diabetes in Swiss Primary Care: A Study Protocol
Source: MDPI journal article supplement (doi:10.3390/pharmacy8020106), 2020-06-21
Supplement: s1 [file s1]

**Supplementary File 5: Patient interview grid (telephone interviews)**

| <b><u>Themes</u></b>         | <b><u>Questions</u></b>                                                                                                                                                                                                                                                                                                                             | <b><u>Follow-up questions</u></b>                                                                                                                                                                                                                                                                                                                                                                                                            | <b><u>Notes</u></b> |
|------------------------------|-----------------------------------------------------------------------------------------------------------------------------------------------------------------------------------------------------------------------------------------------------------------------------------------------------------------------------------------------------|----------------------------------------------------------------------------------------------------------------------------------------------------------------------------------------------------------------------------------------------------------------------------------------------------------------------------------------------------------------------------------------------------------------------------------------------|---------------------|
| <b>Siscare</b>               | <ul style="list-style-type: none"> <li>• What are the reasons for participating in this program?</li> </ul>                                                                                                                                                                                                                                         | <ul style="list-style-type: none"> <li>• How much do you think you need a pharmacist's help with your daily medications?</li> </ul>                                                                                                                                                                                                                                                                                                          |                     |
| <b>Pharmacist interviews</b> | <ul style="list-style-type: none"> <li>• How would you rate the usefulness of the interviews with the pharmacist?</li> <li>• What did you get out of the interviews with the pharmacist?</li> <li>• [If you discuss the adherence chart with the pharmacist]<br/>What do you get out of discussing adherence charts with the pharmacist?</li> </ul> | <ul style="list-style-type: none"> <li>• How would you rate the length of your visit to the pharmacist?</li> <li>• How would you rate the frequency of meetings with the pharmacist?</li> <li>• If so, how were they helpful?</li> <li>• If not, what improvements would you recommend?</li> <li>• How has the program helped you talk to your pharmacist about medication use?</li> <li>• How did you feel during the follow-up?</li> </ul> |                     |
| <b>Electronic pillboxes</b>  | <ul style="list-style-type: none"> <li>• How do you rate the usefulness of these pillboxes ?</li> </ul>                                                                                                                                                                                                                                             | <ul style="list-style-type: none"> <li>• How did you integrate the pillboxes into your daily life?</li> <li>• What are the advantages and disadvantages of the pillbox?</li> </ul>                                                                                                                                                                                                                                                           |                     |

|                                 |                                                                                                                                                                                                                                                                  |                                                                                                                                                |                                                                                                                                                    |
|---------------------------------|------------------------------------------------------------------------------------------------------------------------------------------------------------------------------------------------------------------------------------------------------------------|------------------------------------------------------------------------------------------------------------------------------------------------|----------------------------------------------------------------------------------------------------------------------------------------------------|
| Interprofessional collaboration | <ul style="list-style-type: none"> <li>How do you perceive the collaboration between your pharmacist and your referent physician?</li> </ul>                                                                                                                     | <ul style="list-style-type: none"> <li>Do you think the collaboration between your physician and pharmacist has improved your care?</li> </ul> |                                                                                                                                                    |
| Continuation/stop               | <ul style="list-style-type: none"> <li>[If patient still in program] Would you like to continue this program?</li> <li>[If patient has discontinued program] Why did you stop tracking?</li> </ul>                                                               | <ul style="list-style-type: none"> <li>Why?</li> </ul>                                                                                         |                                                                                                                                                    |
| Recommendation                  | <ul style="list-style-type: none"> <li>Would you recommend the program to another person with diabetes?</li> </ul>                                                                                                                                               | <ul style="list-style-type: none"> <li>Why?</li> </ul>                                                                                         |                                                                                                                                                    |
| Improvement                     | <ul style="list-style-type: none"> <li>What recommendations would you make to improve the program?</li> </ul>                                                                                                                                                    | <ul style="list-style-type: none"> <li>Would you change anything in the program?</li> </ul>                                                    |                                                                                                                                                    |
| Ending                          | <ul style="list-style-type: none"> <li>Is there anything else we haven't talked about that you think is important to talk about now?</li> </ul>                                                                                                                  | -                                                                                                                                              |                                                                                                                                                    |
| Questions (verification)        | <ul style="list-style-type: none"> <li>Can you confirm your date of birth? (DD.MM.YYYY)</li> <li>Do you have a weekly pillbox at home? (Whoever prepares it)</li> <li>Are you taking more than 4 oral medications over a period of at least 3 months?</li> </ul> |                                                                                                                                                | <p>.....</p> <p><input type="checkbox"/> YES    <input type="checkbox"/> NO</p> <p><input type="checkbox"/> YES    <input type="checkbox"/> NO</p> |
| Acknowledgements                |                                                                                                                                                                                                                                                                  |                                                                                                                                                |                                                                                                                                                    |
