# Supplementary material for: Implementation and Effectiveness of an Interprofessional Support Program for Patients with Type 2 Diabetes in Swiss Primary Care: A Study Protocol
Source: MDPI journal article supplement (doi:10.3390/pharmacy8020106), 2020-06-21
Supplement: s1 [file s1]

**Supplementary File 4: Patient satisfaction questionnaire (translated from French)**

**These questions are about your overall thoughts on the program**

**What are the reasons for participating in this follow-up program?**

(Multiple answers allowed)

- ☐ Because I was recently diagnosed
- ☐ Because I was starting a new treatment
- ☐ To be supported in the daily intake of my treatment
- ☐ For help in managing my illness
- ☐ Being able to discuss my illness and treatments with a healthcare professional other than my physician
- ☐ For Fear of treatment side effects
- ☐ To please my pharmacist
- ☐ To advance research
- ☐ Out of curiosity
- ☐ I don't know
- ☐ Other reasons (please specify) : .....

**How often do you think you need the help of a pharmacist for the daily intake of your medications?**

(One answer allowed)

- ☐ Always
- ☐ Often
- ☐ Rarely
- ☐ Never
- ☐ I don't know

**These questions are about how you feel about the pharmacist interviews**

**Were the interviews with the pharmacist useful?**

(One answer allowed)

- ☐ Very useful
- ☐ Quite useful
- ☐ Rather useless
- ☐ Very useless
- ☐ I don't know

**How much did the interviews with the pharmacist help you to...?**

*(One possible answer per line)*

|                                                                                    | A lot                    | Fairly                   | A bit                    | Not at all               | I don't know             |
|------------------------------------------------------------------------------------|--------------------------|--------------------------|--------------------------|--------------------------|--------------------------|
| • ... understand your treatment                                                    | <input type="checkbox"/> |
| • ... integrate the treatment into your life                                       | <input type="checkbox"/> |
| • ... keep you motivated                                                           | <input type="checkbox"/> |
| • ... deal with difficult moments, moments of doubt                                | <input type="checkbox"/> |
| • ... take your medications                                                        | <input type="checkbox"/> |
| • ... manage side effects of your treatment                                        | <input type="checkbox"/> |
| • ... react correctly in particular situations (weekends, outings, holidays, etc.) | <input type="checkbox"/> |
| • ... talk about how your feelings regarding your treatment, about your illness    | <input type="checkbox"/> |

Other improvements noted as a result of this program (please specify):.....

.....

**During interviews with the pharmacist, how often did you have the opportunity to express any problems encountered in taking your medications?**

*(One answer allowed)*

- ☐ Always
- ☐ Often
- ☐ Rarely
- ☐ Never
- ☐ I don't know

**Did you discuss the adherence graph with your pharmacist during interviews?**

*(One answer allowed)*

- ☐ Always
- ☐ Often
- ☐ Rarely
- ☐ Never
- ☐ I don't know

**If you discussed the adherence graph during the interviews, was it useful?**

*(One answer allowed)*

- ☐ Very useful
- ☐ Quite useful
- ☐ Rather useless
- ☐ Very useless
- ☐ I don't know

What is the reason for that?

.....

.....

.....

.....

.....

.....

**During the follow-up, how did you feel...?**

*(One possible answer per line)*

|                                                                | Always                   | Often                    | Rarely                   | Never                    | I don't know             |
|----------------------------------------------------------------|--------------------------|--------------------------|--------------------------|--------------------------|--------------------------|
| • ...monitored                                                 | <input type="checkbox"/> |
| • ...encouraged                                                | <input type="checkbox"/> |
| • ...helped                                                    | <input type="checkbox"/> |
| • Other pleasant or unpleasant feelings (please specify):..... |                          |                          |                          |                          |                          |
| .....                                                          |                          |                          |                          |                          |                          |

**Was the duration of the interviews with the pharmacist...?**

*(One answer allowed)*

- ☐ Too long
- ☐ Adequate
- ☐ Too short
- ☐ I don't know

**Was the frequency of the interviews with the pharmacist... ?**

*(One answer allowed)*

- ☐ Too high
- ☐ Adequate
- ☐ Not enough
- ☐ I don't know

**These questions are about what you think of the electronic pillbox**

**Were the pillboxes useful?**

*(One answer allowed)*

- ☐ Very useful
- ☐ Quite useful
- ☐ Rather useless
- ☐ Very useless
- ☐ I don't know

**How easy was it to use the pillboxes in your daily life?**

*(One answer allowed)*

- ☐ Very easy
- ☐ Quite easy
- ☐ Rather difficult
- ☐ Very difficult
- ☐ I don't know

**Has the display (LCD screen) of the electronic pillbox been a useful reminder in daily life?**

*(One answer allowed)*

- ☐ Very useful
- ☐ Quite useful
- ☐ Rather useless
- ☐ Very useless
- ☐ I don't know

**To what extent did you find the electronic pillbox cumbersome?**

*(One answer allowed)*

- ☐ Not at all cumbersome
- ☐ Space-saving
- ☐ Rather cumbersome
- ☐ Very cumbersome
- ☐ I don't know

**These questions concern the collaboration between your physician and pharmacist**

**How do you perceive the collaboration between your pharmacist and your physician?**

*(One answer allowed)*

- ☐ Very present
- ☐ Relatively present
- ☐ Not very present
- ☐ Inexistent
- ☐ I don't know

**Do you think the collaboration between your physician and pharmacist has improved your care management?** *(One answer allowed)*

- ☐ A lot
- ☐ Fairly
- ☐ A bit
- ☐ Not at all
- ☐ I don't know

**Continuation**

**Would you like to continue this program?**

*(One answer allowed)*

- ☐ Yes, without a doubt
- ☐ Pretty much
- ☐ Not really
- ☐ No, I don't
- ☐ I don't know

**Recommendation**

**Would you recommend the program to another person with diabetes?** *(One answer allowed)*

- ☐ Yes, without a doubt
- ☐ Pretty much
- ☐ Not really
- ☐ No, I don't
- ☐ I don't know

What is the reason for that?

.....  
.....

What is the reason for that?

.....  
.....

**Improvement**

**If you were in charge of this program, what would you change to improve it?**

.....  
.....  
.....  
.....

**Further information**

**Do you have any comments (remarks, suggestions, etc.) to make about your diabetes monitoring by the pharmacist?**

.....  
.....  
.....  
.....
