# Supplementary material for: Implementation and Effectiveness of an Interprofessional Support Program for Patients with Type 2 Diabetes in Swiss Primary Care: A Study Protocol
Source: Pharmacy (Basel). 2020 Jun 21;8(2):106. doi: 10.3390/pharmacy8020106 (PMC7357028; doi:10.3390/pharmacy8020106)
Supplement: Supplementary file 1 [file pharmacy-08-00106-s001.zip]

Archive with 5 entries (5 files):
- Supplementary File 1.pdf
- Supplementary File 2.pdf
- Supplementary File 3.pdf
- Supplementary File 4.pdf
- Supplementary File 5.pdf
