# Supplementary figures and images for: Implementation and Effectiveness of an Interprofessional Support Program for Patients with Type 2 Diabetes in Swiss Primary Care: A Study Protocol
Source: MDPI journal article supplement (doi:10.3390/pharmacy8020106), 2020-06-21

## Supplementary File 1

Figure S1: Flowchart of a patient, physician and pharmacist in the study

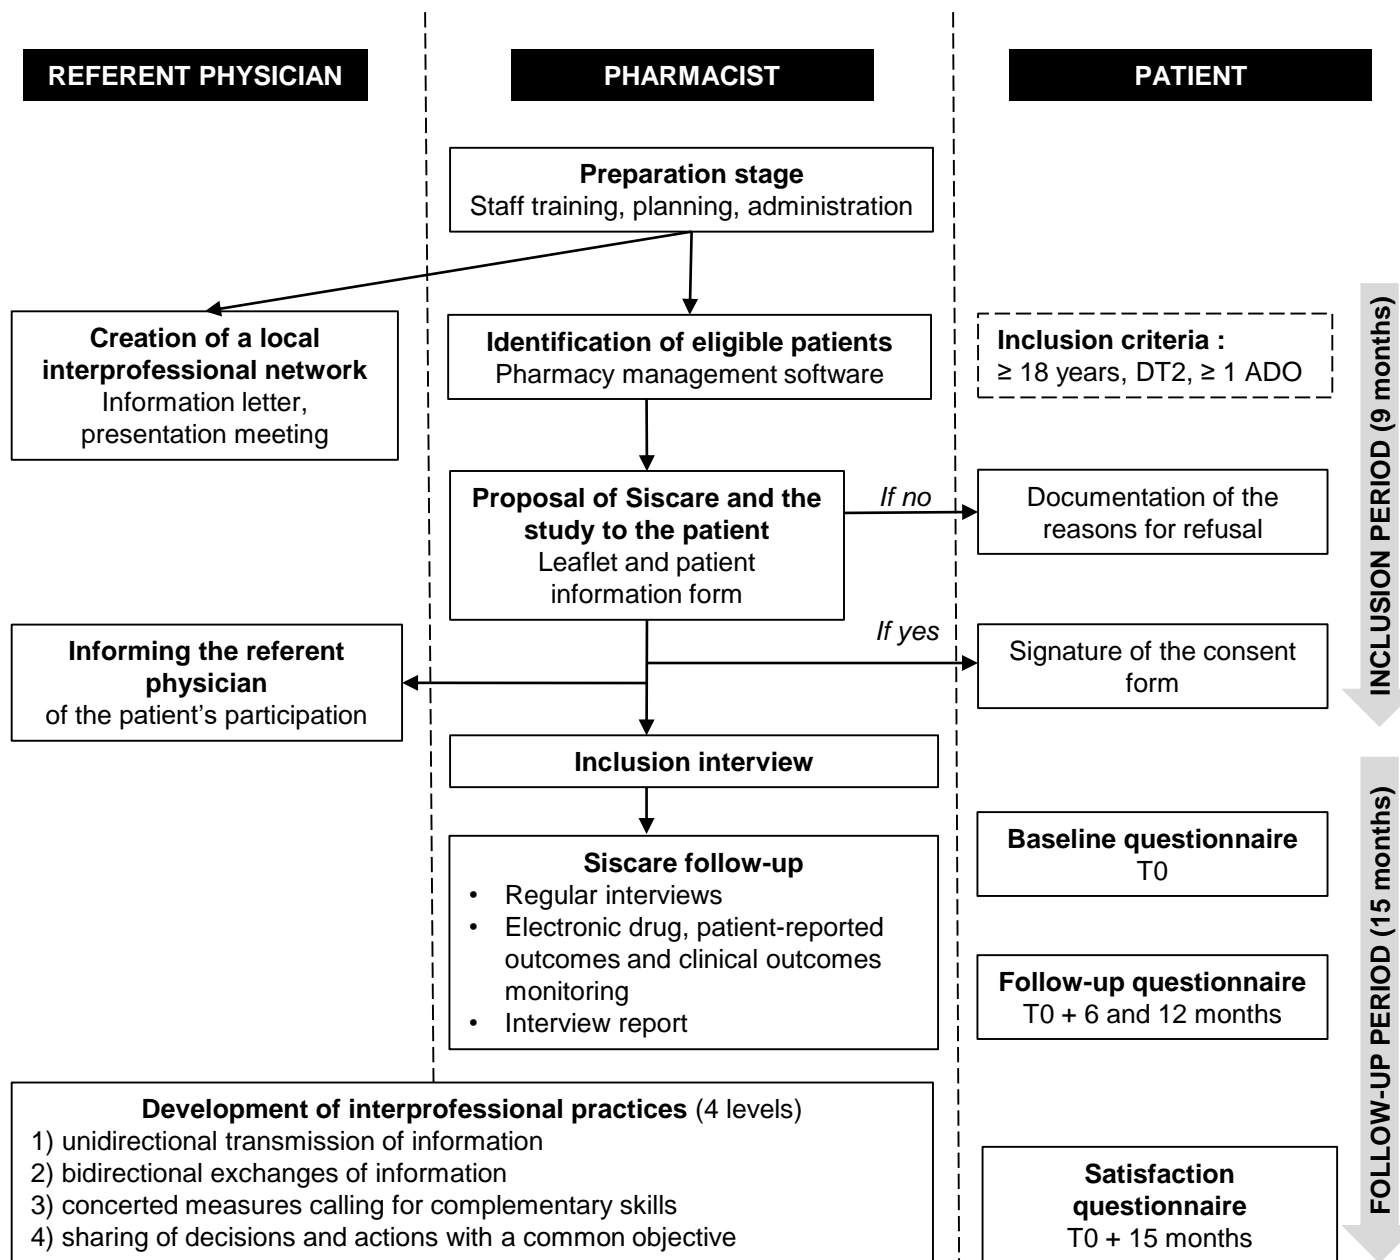

Supplement: s1 [file s1]
